# Supplementary material for: Toward Energy Neutrality: Novel Wastewater Treatment Incorporating Acidophilic Ammonia Oxidation
Source: PubMed Central journal article supplement — Environ Sci Technol. 2023 Mar 10;57(11):4522–32. doi: 10.1021/acs.est.2c06444 (PMC10035426; doi:10.1021/acs.est.2c06444), 2023-03-10
Supplement: es2c06444_si_001.pdf [file es2c06444_si_001.pdf]

1                                    **Supporting information for the *ES&T* article**

2

3                    **Towards energy neutrality: novel wastewater treatment incorporating**

4                                    **acidophilic ammonia oxidation**

5

6                                    Zhetai Hu,<sup>a</sup> Tao Liu,<sup>a</sup> Zhiyao Wang,<sup>a</sup> Jia Meng,<sup>b</sup> and Min Zheng<sup>a,\*</sup>

7

8                    <sup>a</sup>Australian Centre for Water and Environmental Biotechnology, The University of

9                                    Queensland, St Lucia, Queensland 4072, Australia

10                    <sup>b</sup>State Key Laboratory of Urban Water Resource and Environment, Harbin Institute of

11                                    Technology, 73 Huanghe Road, Harbin 150090, China

12

13                                    **\*Corresponding author**

14                                    Email address: [m.zheng@uq.edu.au](mailto:m.zheng@uq.edu.au) (Min Zheng)

15

16    Number of pages: 15

17    Number of figures: 6

18    Number of tables: 6

19

20

21

## 22 **Text S1. Chemical analyses and calculation**

23 COD concentration was measured using the standard test kits (range 25–1500 mg/L, Merck).  
24  $\text{NH}_4^+\text{-N}$ ,  $\text{NO}_2^-\text{-N}$ ,  $\text{NO}_3^-\text{-N}$ , and  $\text{PO}_4^{3-}\text{-P}$  concentrations were analysed using a Flow Injection  
25 Analyser (Lachat Instrument, Milwaukee, Wisconsin). Analyses of total and dissolved iron,  
26 TP, and total kjeldahl nitrogen (TKN) concentrations were conducted by using Inductive  
27 Column Plasma Optical Emission Spectroscopy (ICP-OES, Perkin Elmer Optima 7300DV,  
28 Waltham, USA). The pH was measured using a portable pH monitor and probe (pH 5+,  
29 Oakton). Organic micropollutants were measured by liquid chromatography tandem mass  
30 spectrometry (LC-MS/MS). The dissolved oxygen (DO) concentration was measured using a  
31 portable DO monitor and probe (Optical DO sensor inPro 6960i, Mettler Toledo). Organic  
32 nitrogen was calculated as the difference between TKN and  $\text{NH}_4^+\text{-N}$ . Alkalinity was  
33 determined by titration with an ending pH value of 4.3 according to the standard method.<sup>1</sup>  
34 FNA concentration was calculated according to the equation  $\text{FNA (mg HNO}_2\text{-N/L)} =$

35  $\frac{\text{NO}_2^- \text{ (mg N/L)}}{e^{-2300/273 + \text{Temp}(\text{°C})} \times 10^{\text{pH}}}$ . The apparent activation energy ( $E_a$ , kJ/mol) was estimated by the slope  
36 of linear regression of Arrhenius plot:  $\ln r = -\frac{E_a}{R} \cdot \frac{1}{T} + \ln A$ , where  $r$  is the biomass activity,  
37  $R$  is the gas constant (8.32 J/mol/K),  $T$  is the temperature in kelvin, and  $A$  is the reaction  
38 frequency factor.

39

## 40 **Text S2. Measurement of maximal activity for AOB, NOB and anammox bacteria**

41 The maximal activities of AOB and NOB were measured in the aerobic MBBR, and the  
42 maximal anammox activity was assessed in the anoxic MBBR. Each test lasted for 3 h,  
43 during which all the controllers including two feeding pumps and two pH control systems  
44 were temporarily turned off. A  $\text{NH}_4\text{HCO}_3$  stock solution (10 g N/L) of 10 mL and a  $\text{Na}_2\text{NO}_2$   
45 stock solution (10 g N/L) of 8 mL were added into the aerobic MBBR to increase  $\text{NH}_4^+\text{-N}$   
46 and  $\text{NO}_2^-\text{-N}$  concentrations to about 60–80 mg N/L. The DO concentration was maintained  
47 above 7.0 mg/L by constantly supplying compressed air to the reactor at a flow rate of 1.0  
48 L/min via an air pump (whisper 100, China). The pH of aerobic MBBR was controlled  
49 between 7.0 and 7.5 by adding 0.1 M HCL and 0.1 M NaOH manually. Liquid samples were  
50 collected every 0.5 h to the end of test, and then filtered by 0.22  $\mu\text{m}$  disposable sterile  
51 Millipore filters (Merck) for the analysis of  $\text{NH}_4^+\text{-N}$ ,  $\text{NO}_2^-\text{-N}$  and  $\text{NO}_3^-\text{-N}$  concentrations. The  
52 maximal AOB and NOB activities were represented by the volumetric  $\text{NH}_4^+\text{-N}$  oxidation and  
53  $\text{NO}_3^-\text{-N}$  production rates, which were determined through linear regression of corresponding  
54 profiles obtained from the batch test. In the anoxic MBBR, 6 mL  $\text{NH}_4\text{HCO}_3$  stock solution  
55 (10 g N/L) and 6 mL  $\text{Na}_2\text{NO}_2$  stock solution (10 g N/L) were added to increase  $\text{NH}_4^+\text{-N}$  and  
56  $\text{NO}_2^-\text{-N}$  concentrations to 60–70 mg N/L. To remove oxygen in anoxic MBBR, compressed  
57 pure dinitrogen ( $\text{N}_2$ ) gas was continually flushed in the reactor at a flow rate of 1.0 L/min  
58 during the test. The pH control and sampling strategy of anoxic MBBR were similar to the  
59 test performed in aerobic MBBR. The volumetric  $\text{NH}_4^+\text{-N}$  oxidation rate, which was  
60 determined through linear regression of the ammonium profile obtained from the batch test,  
61 represented the maximal anammox activity.

62

63 **Text S3. DNA extraction, 16S rRNA gene amplicon sequencing, and data analyses**

64 Two aerobic and two anoxic biofilm samples were collected at the end of Phase I (i.e.,  
65 operating temperature of 23°C) and IV (i.e., operating temperature of 12°C), respectively.  
66 After collection, all samples were stored at -80°C before being assessed by the Australian  
67 Centre for Ecogenomics at The University of Queensland (<https://ecogenomic.org/>). DNA  
68 was extracted from 50-200 mg of raw sample using Qiagen DNeasy Powersoil Pro Kit (cat  
69 #7016) following the manufacturer's protocol and checked with gel electrophoresis. The 16S  
70 rRNA gene encompassing the V6 to V8 regions was targeted using the 926F (5'- AAA CTY  
71 AAA KGA ATT GRC GG -3') and 1392wR (5'- ACG GGC GGT GWG TRC -3') primers  
72 modified to contain Illumina specific adapter sequence (926F: 5'- TCG TCG GCA GCG  
73 TCA GAT GTG TAT AAG AGA CAG AAA CTY AAA KGA ATT GRC GG -3' and  
74 1392wR: 5'- GTC TCG TGG GCT CGG AGA TGT GTA TAA GAG ACA GAC GGG  
75 CGG TGW GTR C -3'). The universal primer pair 926F-1392wR amplifies the small subunit  
76 (SSU) ribosomal RNA of eukaryotes (18S) and prokaryotes (16S) specifically the V6, V7 and  
77 V8 regions. Raw sequencing data was processed by Quantitative Insights Microbial Ecology  
78 II (QIIME II) in multiple steps, including poor-sequences removal. After that, the sequences  
79 were clustered into operational taxonomic units (OTUs) at 97% identify threshold.

80

81 **Text S4. Mass and energy balance assessments**

82 The mass and energy balance assessments were carried out to further evaluate the feasibility  
83 of applying this novel system for domestic wastewater treatment. The evaluation of mass  
84 balance was performed based on the measured data of the laboratory-scale treatment system.  
85 The energy balance assessment was performed in a hypothetical WWTP with a treatment  
86 capacity of 10,000 m<sup>3</sup>/d, according to Wu et al.<sup>2</sup> The main parameters used for the calculation  
87 are summarized in Table S5.

88

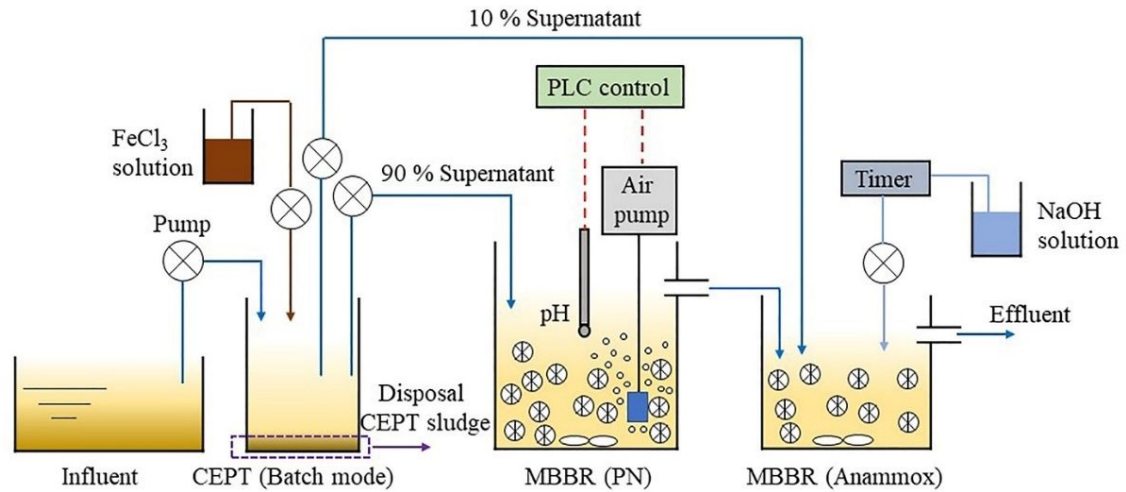

89  
90  
91

**Figure S1.** The schematic diagram of the laboratory-scale wastewater treatment system.

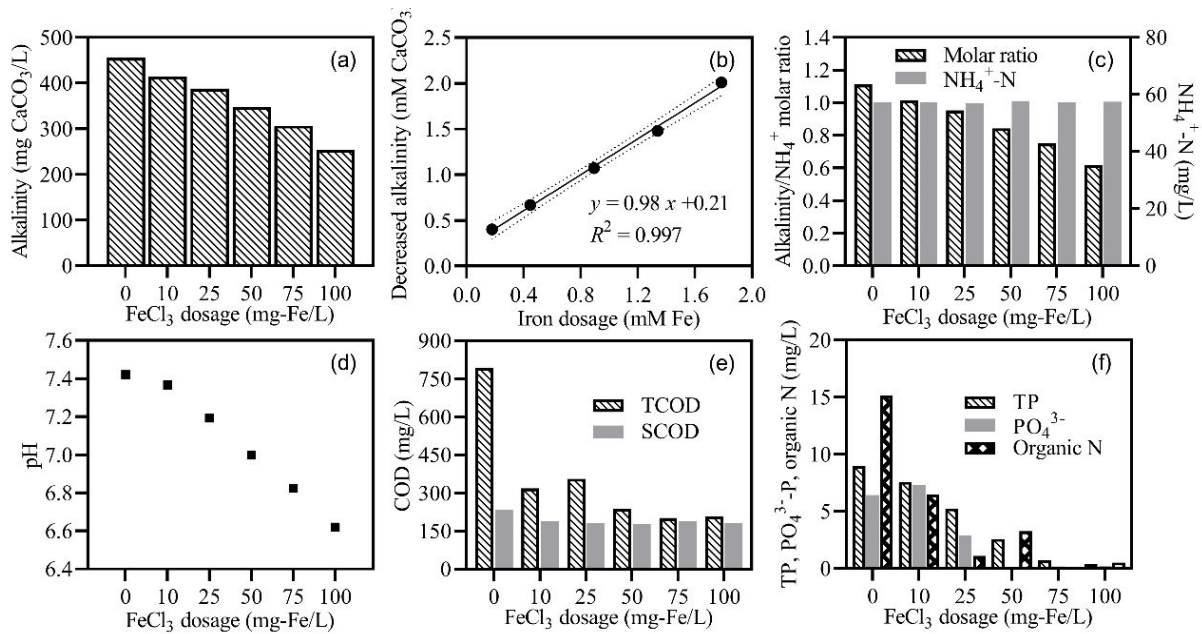

92  
93  
94  
95  
96  
97  
98  
99  
100

**Figure S2.** Changes of wastewater composition with the addition of  $\text{FeCl}_3$  at different concentrations. (a) The change of wastewater  $\text{CaCO}_3$ -alkalinity with the increased Fe dosage. (b) The linear relationship between decreased  $\text{CaCO}_3$ -alkalinity and dosed Fe. (c) The changes of  $\text{CaCO}_3$ -alkalinity/ $\text{NH}_4^+$ -N molar ratio and  $\text{NH}_4^+$ -N concentration with the increased Fe dosage. (d) The profile of wastewater pH with the increased Fe dosage. (e) the shifts of TCOD and SCOD concentrations with the increased Fe dosage. (f) The changes of TP,  $\text{PO}_4^{3-}$ -P, and organic nitrogen concentrations with the increased Fe dosage.

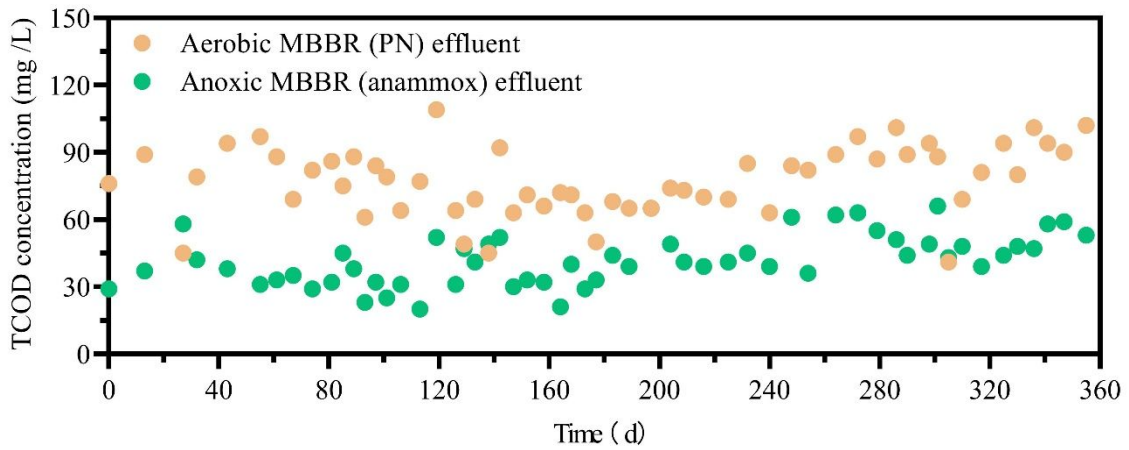

101  
102  
103

**Figure S3.** COD concentration in the effluent of aerobic and anoxic MBBRs.

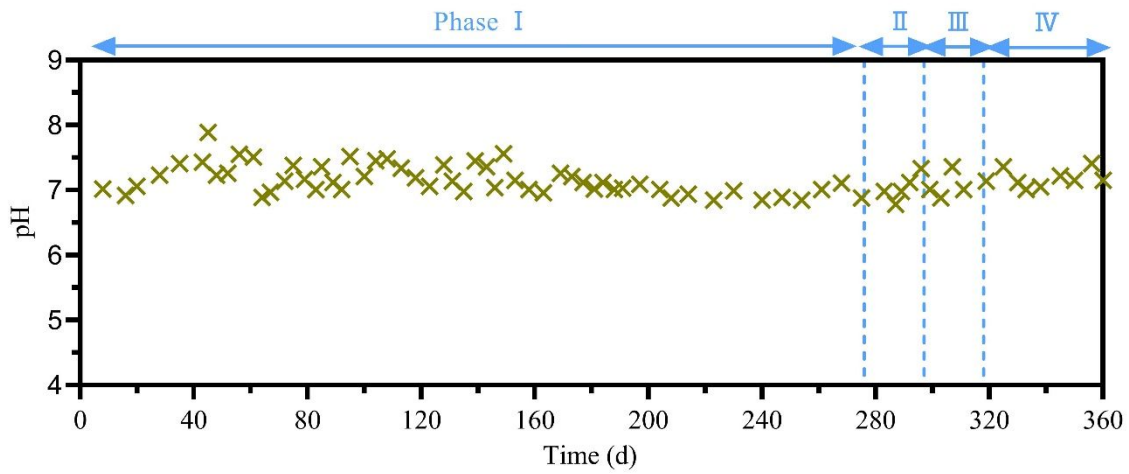

104  
105  
106  
107  
108

**Figure S4.** The pH of anoxic MBBR during the study period.

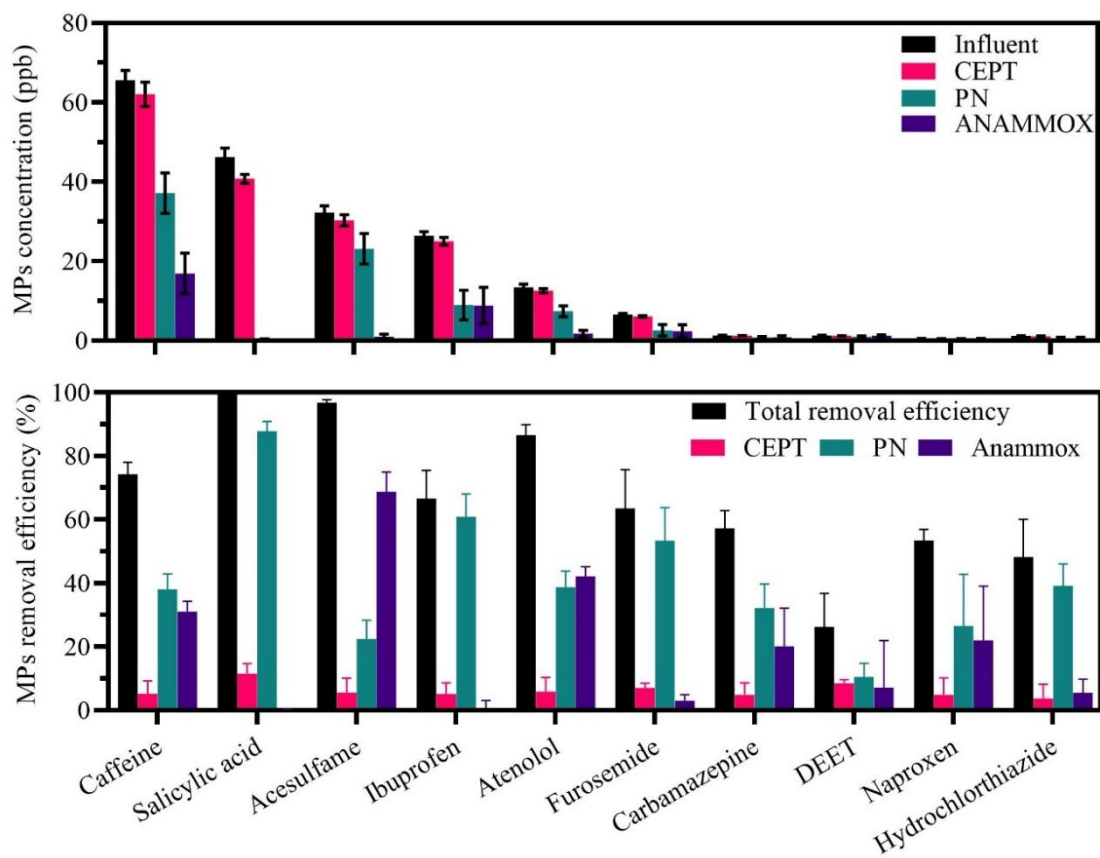

109  
 110  
 111  
 112

**Figure S5.** Micropollutants concentration (upper) and removal efficiency (down) in different units of the wastewater treatment system.

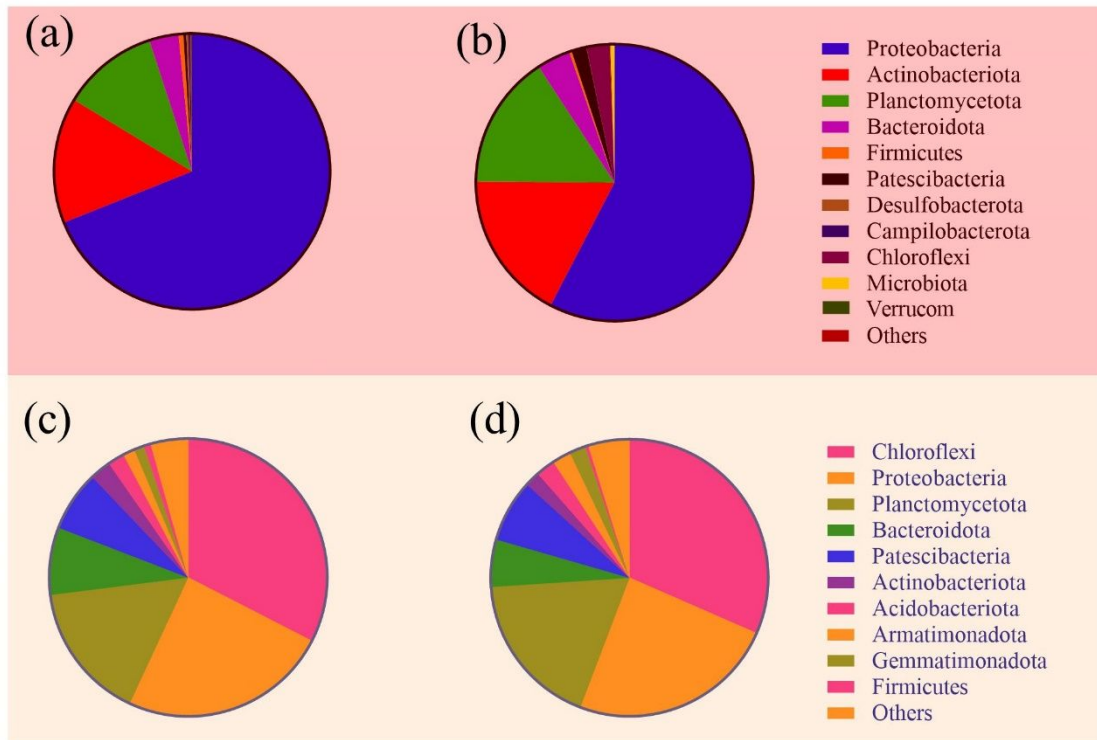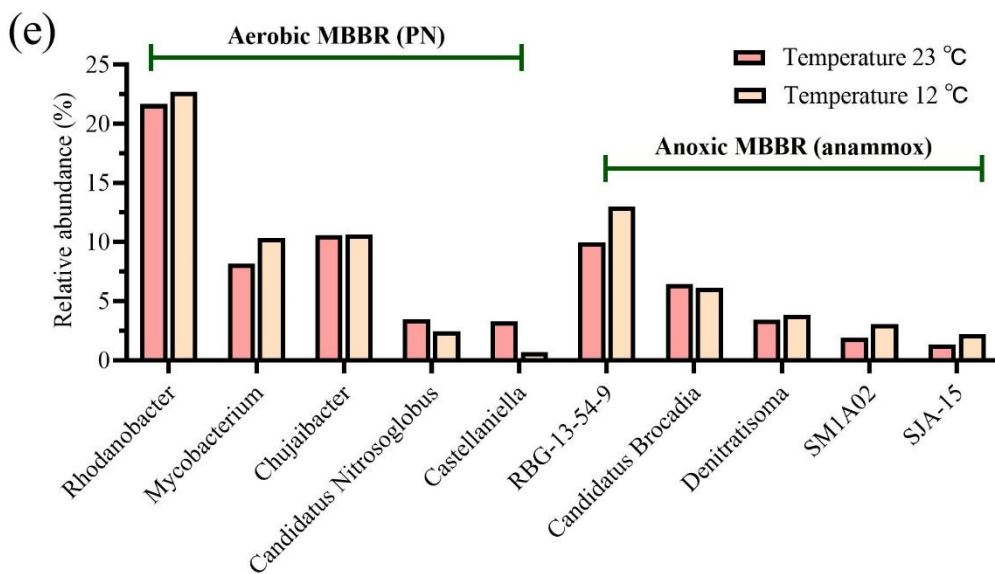

113  
 114 **Figure S6.** The microbial composition of the two-stage PN/A system. (a) The top ten phyla  
 115 of aerobic MBBR at 23°C. (b) The top ten phyla of aerobic MBBR at 12°C. (c) The top ten  
 116 phyla of anoxic MBBR at 23°C. (d) The top ten phyla of anoxic MBBR at 12°C. (e) The top  
 117 five genera in both aerobic and anoxic MBBRs at 23°C and 12°C.  
 118

119

**Table S1.** Main characteristics of raw domestic wastewater used in this study.

| Parameter                        | Unit                    | Average value $\pm$ standard error | Number of samples |
|----------------------------------|-------------------------|------------------------------------|-------------------|
| TCOD                             | mg/L                    | 461.7 $\pm$ 46.1                   | 27                |
| SCOD                             | mg/L                    | 218.3 $\pm$ 13.2                   | 27                |
| NH <sub>4</sub> <sup>+</sup> -N  | mg/L                    | 46.1 $\pm$ 5.7                     | 76                |
| NO <sub>2</sub> <sup>-</sup> -N  | mg/L                    | ND <sup>a</sup>                    | 76                |
| NO <sub>3</sub> <sup>-</sup> -N  | mg/L                    | ND <sup>a</sup>                    | 76                |
| PO <sub>4</sub> <sup>3-</sup> -P | mg/L                    | 6.8 $\pm$ 1.3                      | 76                |
| Alkalinity                       | mg CaCO <sub>3</sub> /L | 382.4 $\pm$ 35.6                   | 35                |
| pH                               | -                       | 7.1 $\pm$ 0.1                      | 38                |

120 <sup>a</sup> ND: Not detected as the nitrite and nitrate was always below 0.5 mg/L and could be  
 121 neglected during the experiments.

122



123 **Table S2.** Removals of organic carbon and nutrients by the integrated wastewater treatment system (CEPT, acidic PN and anammox) at different  
 124 temperatures.

| Parameter                                      | Unit     | Temperature | Raw wastewater  | CEPT effluent   | Acidic PN effluent | Anammox Effluent |
|------------------------------------------------|----------|-------------|-----------------|-----------------|--------------------|------------------|
| COD concentration                              | mg COD/L | 23°C        | 468.3 ± 50.7    | 176.3 ± 19.2    | 73.9 ± 13.9        | 38.8 ± 10.8      |
|                                                |          | 20°C        | 432.5 ± 4.9     | 168.3 ± 3.8     | 92.3 ± 7.6         | 50.0 ± 5.6       |
|                                                |          | 15°C        | 439.5 ± 33.2    | 167.7 ± 21.0    | 66.0 ± 23.6        | 52.3 ± 12.1      |
|                                                |          | 12°C        | 449.7 ± 20.6    | 178.0 ± 8.5     | 93.5 ± 7.7         | 49.8 ± 5.3       |
| PO <sub>4</sub> <sup>3-</sup> -P concentration | mg P/L   | 23°C        | 6.6 ± 1.5       | 0.6 ± 0.4       | 0.7 ± 0.3          | 0.3 ± 0.2        |
|                                                |          | 20°C        | 7.1 ± 1.2       | 0.7 ± 0.3       | 0.5 ± 0.2          | 0.4 ± 0.1        |
|                                                |          | 15°C        | 6.5 ± 0.8       | 0.5 ± 0.3       | 0.5 ± 0.1          | 0.5 ± 0.2        |
|                                                |          | 12°C        | 6.8 ± 0.7       | 0.5 ± 0.3       | 0.5 ± 0.2          | 0.4 ± 0.1        |
| NH <sub>4</sub> <sup>+</sup> -N concentration  | mg N/L   | 23°C        | 49.2 ± 4.9      | 48.4 ± 5.3      | 16.9 ± 4.2         | 2.7 ± 1.4        |
|                                                |          | 20°C        | 42.9 ± 4.7      | 43.4 ± 4.5      | 17.4 ± 3.4         | 2.4 ± 0.7        |
|                                                |          | 15°C        | 44.1 ± 0.9      | 42.9 ± 0.6      | 17.3 ± 1.6         | 1.8 ± 0.7        |
|                                                |          | 12°C        | 46.8 ± 1.2      | 45.4 ± 1.8      | 20.1 ± 1.5         | 2.1 ± 0.6        |
| NO <sub>2</sub> <sup>-</sup> -N concentration  | mg N/L   | 23°C        |                 |                 | 28.8 ± 4.2         | 1.5 ± 1.1        |
|                                                |          | 20°C        | ND <sup>a</sup> | ND <sup>a</sup> | 24.3 ± 0.6         | 1.8 ± 0.3        |
|                                                |          | 15°C        |                 |                 | 25.9 ± 2.1         | 2.4 ± 0.4        |
|                                                |          | 12°C        |                 |                 | 25.5 ± 1.9         | 1.9 ± 0.6        |
| NO <sub>3</sub> <sup>-</sup> -N concentration  | mg N/L   | 23°C        |                 |                 | 0.6 ± 0.8          | 1.5 ± 1.1        |
|                                                |          | 20°C        | ND <sup>a</sup> | ND <sup>a</sup> | 0.6 ± 0.6          | 1.8 ± 0.3        |
|                                                |          | 15°C        |                 |                 | 0.2 ± 0.2          | 2.4 ± 0.4        |
|                                                |          | 12°C        |                 |                 | 0.2 ± 0.1          | 1.9 ± 0.6        |
| TN concentration                               | mg N/L   | 23°C        | 49.5 ± 4.9      | 48.6 ± 5.3      | 47.2 ± 6.2         | 5.1 ± 1.8        |
|                                                |          | 20°C        | 43.0 ± 4.7      | 43.7 ± 4.5      | 42.1 ± 3.3         | 5.5 ± 1.1        |
|                                                |          | 15°C        | 44.3 ± 0.9      | 43.0 ± 0.6      | 43.3 ± 1.4         | 5.1 ± 1.1        |
|                                                |          | 12°C        | 47.1 ± 1.2      | 45.7 ± 1.8      | 45.6 ± 2.2         | 5.1 ± 1.2        |

125 <sup>a</sup> ND: Not detected.

**Table S3.** The iron concentration in each part of system.

| Parameter            | Total iron    | Dissolved iron |
|----------------------|---------------|----------------|
| Unit                 | (mg Fe/L)     |                |
| Iron dosage          | 50            |                |
| CEPT effluent        | $2.8 \pm 1.2$ | $0.3 \pm 0.2$  |
| Acidic MBBR effluent | $2.4 \pm 1.2$ | $0.2 \pm 0.1$  |
| Anoxic MBBR effluent | $2.3 \pm 0.8$ | $0.2 \pm 0.1$  |

128 **Table S4.** The performance of mainstream PN/A process in treating low-strength wastewater at low temperature.

| Influent ammonium concentration (mg N/L) | Type of wastewater                           | HRT (h)                   | NLR (kg N/(m <sup>3</sup> ·d)) | Type of reactor | Temperature (°C) | TN removal efficiency (%) | Biomass growth type | Reference  |
|------------------------------------------|----------------------------------------------|---------------------------|--------------------------------|-----------------|------------------|---------------------------|---------------------|------------|
| 53 ± 5                                   | diluted sludge digester                      | 12                        | 0.11 ± 0.01                    | SBR             | 15               | 70.6 ± 19.5               | granules            | 3          |
| 21.2 ± 5.2                               | aerobically pre-treated municipal wastewater | 9-14                      | 0.04-0.06                      | SBR             | 15               | 73.1                      | biofilm             | 4          |
|                                          |                                              | 12-14                     | 0.04                           |                 |                  | 62.3                      | biofilm + suspended |            |
| 23-46                                    | synthetic wastewater                         | 1.57                      | 0.18-0.35                      | RBC             | 15               | 36 ± 9                    | biofilm             | 5          |
|                                          |                                              | 1.09                      | 0.25-0.51                      |                 | 14               | 42 ± 4                    |                     |            |
| 61                                       | synthetic wastewater                         | 5.4                       | 0.27 <sup>a</sup>              | SBAR            | 10               | 39                        | granules            | 6          |
| 50                                       | synthetic wastewater                         | 64.8 - 139.2 <sup>a</sup> | 0.0 - 1-0.02                   | MBBR            | 10               | 71.8 <sup>a</sup>         | biofilm             | 7          |
|                                          |                                              | >240                      | <0.05                          | SBR             |                  | ~30                       | suspended           |            |
| 50                                       | synthetic wastewater                         | 24-48                     | 0.03-0.05                      | SBR             | 10               | ~40                       | granules            | 8          |
|                                          |                                              | 24-48                     | 0.03-0.05                      | MBBR            |                  | ~40                       | biofilm (2 mm)      |            |
|                                          |                                              | 24-48                     | 0.03-0.05                      | MBBR            |                  | ~77                       | biofilm (10 mm)     |            |
| ~70                                      | synthetic wastewater                         | 60                        | ~0.03                          | SBR             | 12               | >90                       | suspended           | 9          |
| 60-80                                    | synthetic wastewater                         | ~8                        | ~0.2                           | SBR             | 15               | <50                       | granules            | 10         |
| 45.4 ± 1.8                               | CEPT pre-treated municipal wastewater        | 12.2                      | ~0.09                          | MBBR            | 12               | 88.9 ± 2.5                | biofilm             | This study |

129 RBC: rotating biological contactor; SBR: sequencing batch reactor; SBAR: sequencing batch air-lift reactor

130

**Table S5.** Main parameters used in the energy balance assessment.

| Parameters                                            | Unit                                          | Value |
|-------------------------------------------------------|-----------------------------------------------|-------|
| Wastewater flow rate                                  | m <sup>3</sup> /d                             | 10000 |
| Fe dosage                                             | mg/L                                          | 50    |
| Influent COD concentration                            | mg/L                                          | 468   |
| Effluent COD concentration                            | mg/L                                          | 40    |
| Influent NH <sub>4</sub> <sup>+</sup> concentration   | mg N/L                                        | 46    |
| Effluent NH <sub>4</sub> <sup>+</sup> concentration   | mg N/L                                        | 3     |
| COD removal efficiency of CEPT                        | %                                             | 62.4  |
| Ratio of NH <sub>4</sub> <sup>+</sup> oxidized by AOB | %                                             | 57    |
| Autotrophic bacteria yield <sup>11</sup>              | g cell formed / g NH <sub>3</sub> -N oxidized | 0.24  |
| Autotrophic bacteria decay <sup>11</sup>              | /day                                          | 0.1   |
| Heterotrophic bacteria yield <sup>11</sup>            | g cell COD formed / g COD removed             | 0.64  |
| Heterotrophic bacteria decay <sup>11</sup>            | /day                                          | 0.2   |
| Anammox bacteria yield <sup>11</sup>                  | g cell formed / g NH <sub>3</sub> -N oxidized | 0.13  |
| Anammox bacteria decay <sup>11</sup>                  | /day                                          | 0.1   |
| Energy recovery efficiency of AD                      | %                                             | 30    |
| Energy density of CH <sub>4</sub>                     | MJ/m <sup>3</sup>                             | 36    |

**Table S6.** Ammonium nitrogen and alkalinity concentrations in domestic wastewater in the literature.

| Type of wastewater                         | Country       | Ammonia nitrogen concentration (mg N/L) | Alkalinity concentration (mg CaCO <sub>3</sub> /L) | Molar ratio of alkalinity to ammonia nitrogen | Reference  |
|--------------------------------------------|---------------|-----------------------------------------|----------------------------------------------------|-----------------------------------------------|------------|
| HRAS (high rate activated sludge) effluent | Australia     | 44.7 ± 4.5                              | 380 ± 10                                           | 1.17 ± 0.03                                   | 12         |
| Raw domestic wastewater                    | China         | 79.1                                    | 510.6                                              | 0.90                                          | 13         |
| Raw domestic wastewater                    | Korea         | 35.2                                    | 195                                                | 0.78                                          | 14         |
| Raw domestic wastewater                    | Greece        | 150                                     | 350                                                | 0.33                                          | 15         |
| Raw domestic wastewater                    | Venezuela     | 21.3                                    | 115.2                                              | 0.76                                          | 16         |
| Raw domestic wastewater                    | Spain         | 29 ± 5                                  | 250 ± 28                                           | ~1.21                                         | 17         |
|                                            |               | 8.6 ± 0.5                               | 73.5 ± 2.4                                         | ~1.20                                         |            |
| Raw domestic wastewater                    | India         | 8.0 ± 0.2                               | 58.8 ± 3.3                                         | ~1.03                                         | 18         |
|                                            |               | 7.2 ± 0.1                               | 62.8 ± 2.8                                         | ~1.22                                         |            |
| Raw domestic wastewater                    | France        | 44.2                                    | 342                                                | 1.08                                          | 19         |
|                                            |               | 12                                      | 50                                                 | 0.58                                          |            |
| Raw domestic wastewater                    | United States | 25                                      | 100                                                | 0.56                                          |            |
|                                            |               | 50                                      | 200                                                | 0.56                                          |            |
| Raw domestic wastewater                    | Brazil        | 17 ± 3                                  | 155 ± 17                                           | ~1.28                                         | 20         |
| Raw domestic wastewater                    | India         | 30–45                                   | 230–300                                            | 0.72–1.40                                     | 21         |
| Raw domestic wastewater                    | Australia     | 46.1 ± 5.7                              | 382.4 ± 35.6                                       | 1.1 ± 0.1                                     | This study |

## References

- (1) APHA. Standard methods for the examination of water and wastewater. **2005**.
- (2) Wu, Z.; Duan, H.; Li, K.; Ye, L. A comprehensive carbon footprint analysis of different wastewater treatment plant configurations. *Environ. Res.* **2022**, 214, 113818.
- (3) Morales, N.; Val del Río, Á.; Vázquez-Padín, J. R.; Méndez, R.; Campos, J. L.; Mosquera-Corral, A. The granular biomass properties and the acclimation period affect the partial nitrification/anammox process stability at a low temperature and ammonium concentration. *Process Biochem.* **2016**, 51 (12), 2134-2142.
- (4) Laurenzi, M.; Falås, P.; Robin, O.; Wick, A.; Weissbrodt, D. G.; Nielsen, J. L.; Ternes, T. A.; Morgenroth, E.; Joss, A. Mainstream partial nitrification and anammox: long-term process stability and effluent quality at low temperatures. *Water Res.* **2016**, 101, 628-639.
- (5) De Clippeleir, H.; Vlaeminck, S. E.; De Wilde, F.; Daeninck, K.; Mosquera, M.; Boeckx, P.; Verstraete, W.; Boon, N. One-stage partial nitrification/anammox at 15 °C on pretreated sewage: feasibility demonstration at lab-scale. *Appl. Microbiol. Biotechnol.* **2013**, 97 (23), 10199-10210.
- (6) Lotti, T.; Kleerebezem, R.; Hu, Z.; Kartal, B.; Jetten, M. S. M.; van Loosdrecht, M. C. M. Simultaneous partial nitrification and anammox at low temperature with granular sludge. *Water Res.* **2014**, 66, 111-121.
- (7) Gilbert, E. M.; Agrawal, S.; Karst, S. M.; Horn, H.; Nielsen, P. H.; Lackner, S. Low Temperature Partial Nitrification/Anammox in a Moving Bed Biofilm Reactor Treating Low Strength Wastewater. *Environ. Sci. Technol.* **2014**, 48 (15), 8784-8792.
- (8) Gilbert, E. M.; Agrawal, S.; Schwartz, T.; Horn, H.; Lackner, S. Comparing different reactor configurations for Partial Nitrification/Anammox at low temperatures. *Water Res.* **2015**, 81, 92-100.
- (9) Hu, Z.; Lotti, T.; de Kreuk, M.; Kleerebezem, R.; van Loosdrecht, M.; Kruit, J.; Jetten, M. S.; Kartal, B. Nitrogen removal by a nitrification-anammox bioreactor at low temperature. *Appl. Environ. Microbiol.* **2013**, 79 (8), 2807-2812.
- (10) Akaboci, T. R. V.; Gich, F.; Ruscalleda, M.; Balaguer, M. D.; Colprim, J. Assessment of operational conditions towards mainstream partial nitrification-anammox stability at moderate to low temperature: Reactor performance and bacterial community. *Chem. Eng. J.* **2018**, 350, 192-200.
- (11) Henze, M.; Gujer, W.; Mino, T.; van Loosdrecht, M. C., *Activated sludge models ASM1, ASM2, ASM2d and ASM3*. **2000**: IWA publishing.
- (12) Wang, Z.; Zheng, M.; Meng, J.; Hu, Z.; Ni, G.; Guerrero Calderon, A.; Li, H.; De Clippeleir, H.; Al-Omari, A.; Hu, S.; Yuan, Z. Robust Nitrification Sustained by Acid-Tolerant Ammonia-Oxidizing Bacteria. *Environ. Sci. Technol.* **2021**, 55 (3), 2048-2056.
- (13) Wu, C.; Chen, Z.; Liu, X.; Peng, Y. Nitrification–denitrification via nitrite in SBR using real-time control strategy when treating domestic wastewater. *Biochem. Eng. J.* **2007**, 36 (2), 87-92.
- (14) Lee, W.; An, S.; Choi, Y. Ammonia harvesting via membrane gas extraction at moderately alkaline pH: A step toward net-profitable nitrogen recovery from domestic

- wastewater. *Chem. Eng. J.* **2021**, 405, 126662.
- (15) Vlyssides, A. G.; Karlis, P. K.; Rori, N.; Zorpas, A. A. Electrochemical treatment in relation to pH of domestic wastewater using Ti/Pt electrodes. *J. Hazard. Mater.* **2002**, 95 (1), 215-226.
- (16) Behling, E.; Diaz, A.; Colina, G.; Herrera, M.; Gutierrez, E.; Chacin, E.; Fernandez, N.; Forster, C. F. Domestic wastewater treatment using a UASB reactor. *Bioresour. Technol.* **1997**, 61 (3), 239-245.
- (17) Beltrán, F. J.; García-Araya, J. F.; Álvarez, P. M. pH sequential ozonation of domestic and wine-distillery wastewaters. *Water Res.* **2001**, 35 (4), 929-936.
- (18) Dash, A. K. Characterization of domestic wastewater at Bhubaneswar, Odisha, India. *Development* **2013**, 25, 27.
- (19) Fulazzaky, M. A. Carbonaceous, nitrogenous and phosphorus matters removal from domestic wastewater by an activated sludge reactor of nitrification-denitrification type. *Journal of environmental science and techJournal of Environmental Medicine* **2009**, 4.
- (20) Araujo Junior, M. M. d.; Lermontov, A.; Araujo, P. L. d. S.; Zaiat, M. Reduction of sludge generation by the addition of support material in a cyclic activated sludge system for municipal wastewater treatment. *Bioresour. Technol.* **2013**, 143, 483-489.
- (21) Bodkhe, S. Y. A modified anaerobic baffled reactor for municipal wastewater treatment. *J. Environ. Manage.* **2009**, 90 (8), 2488-2493.
